# Supplementary material
Source: MDPI journal article supplement (https://www.mdpi.com/1996-1073/10/12/1934)

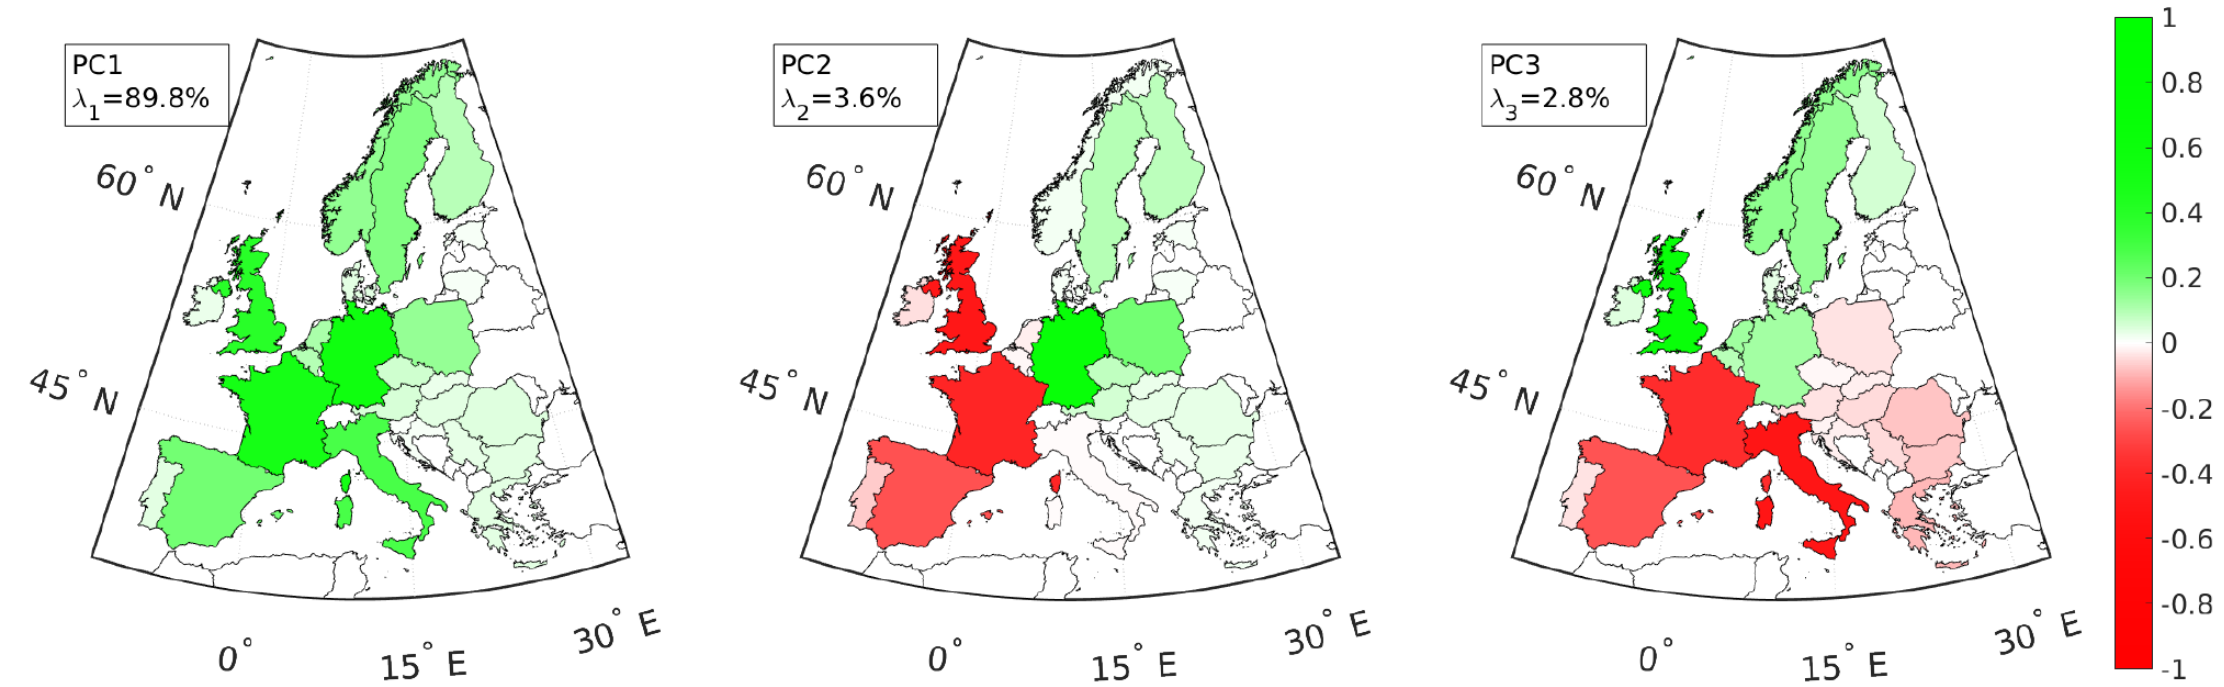

Supplement: s1 [file s1]

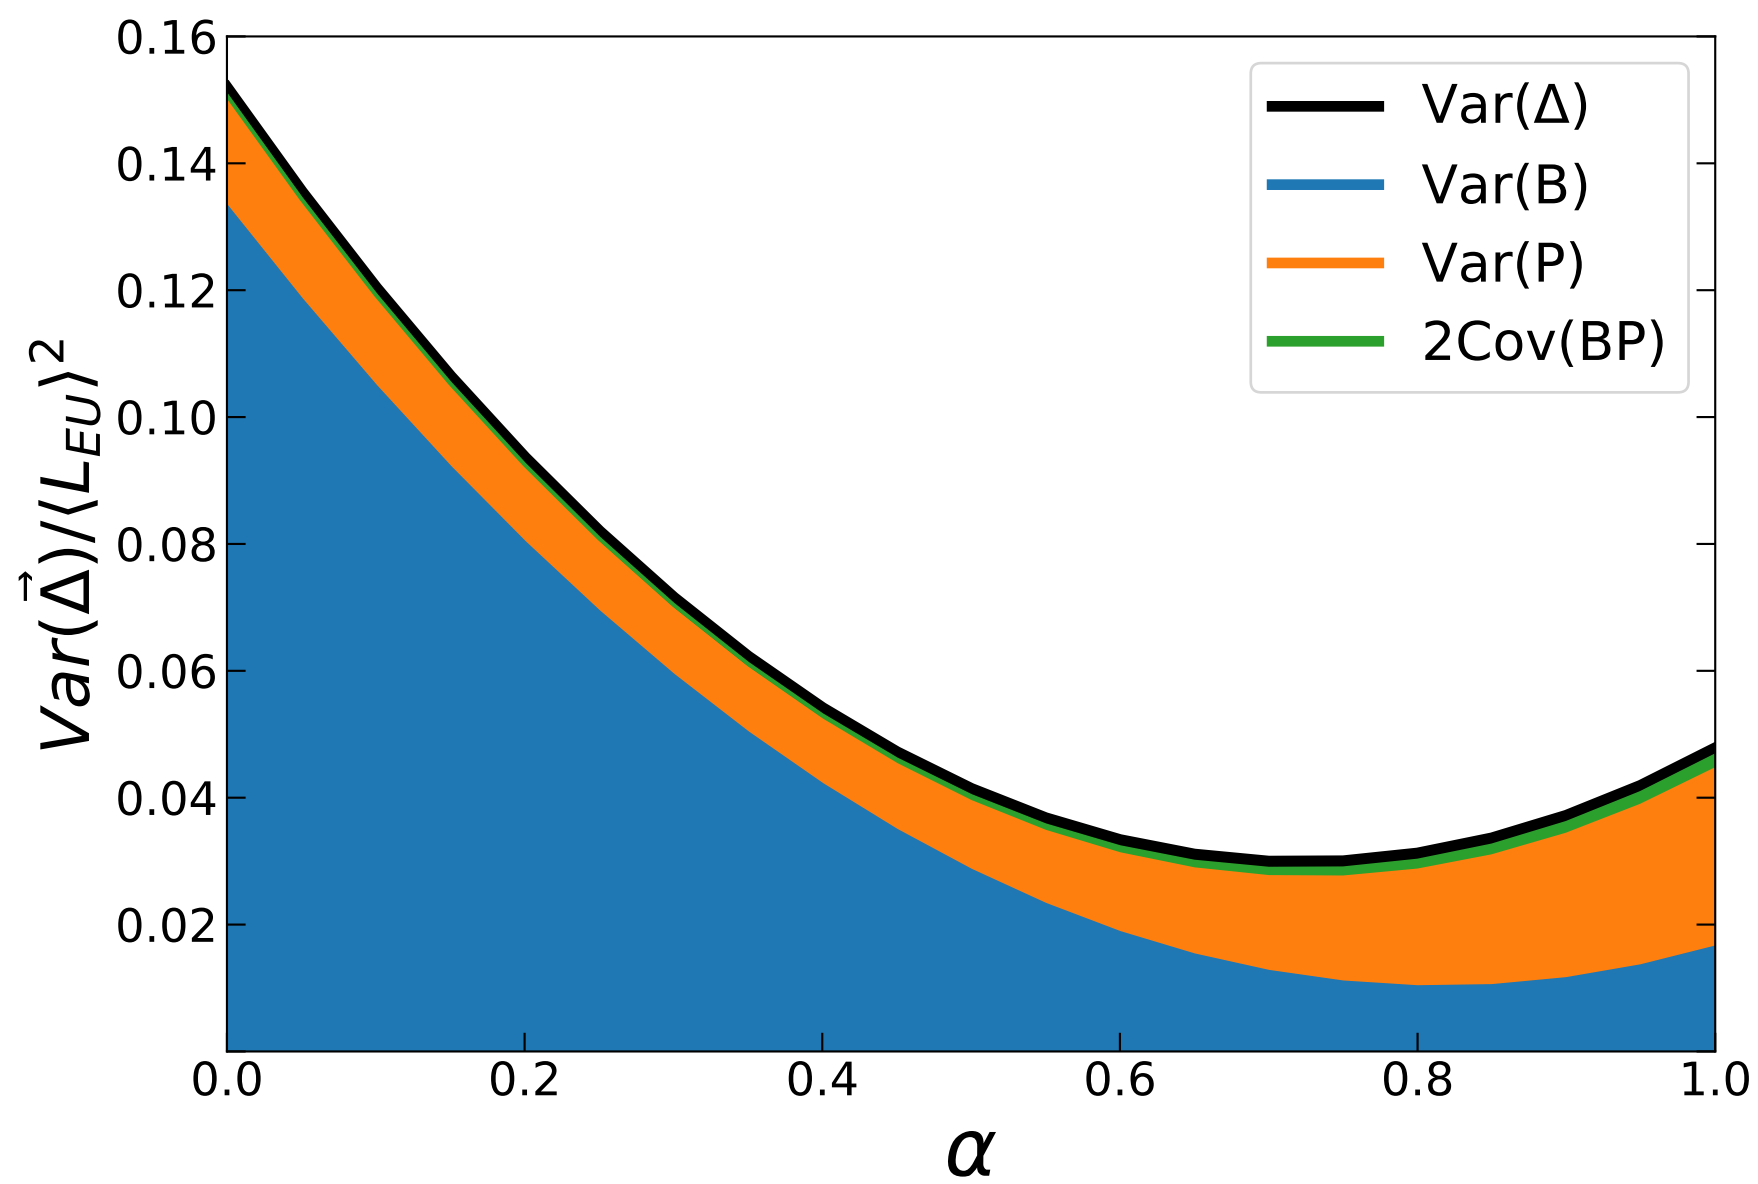

Supplement: s1 [file s1]

$a_k^{\text{seasonal}}(t)$

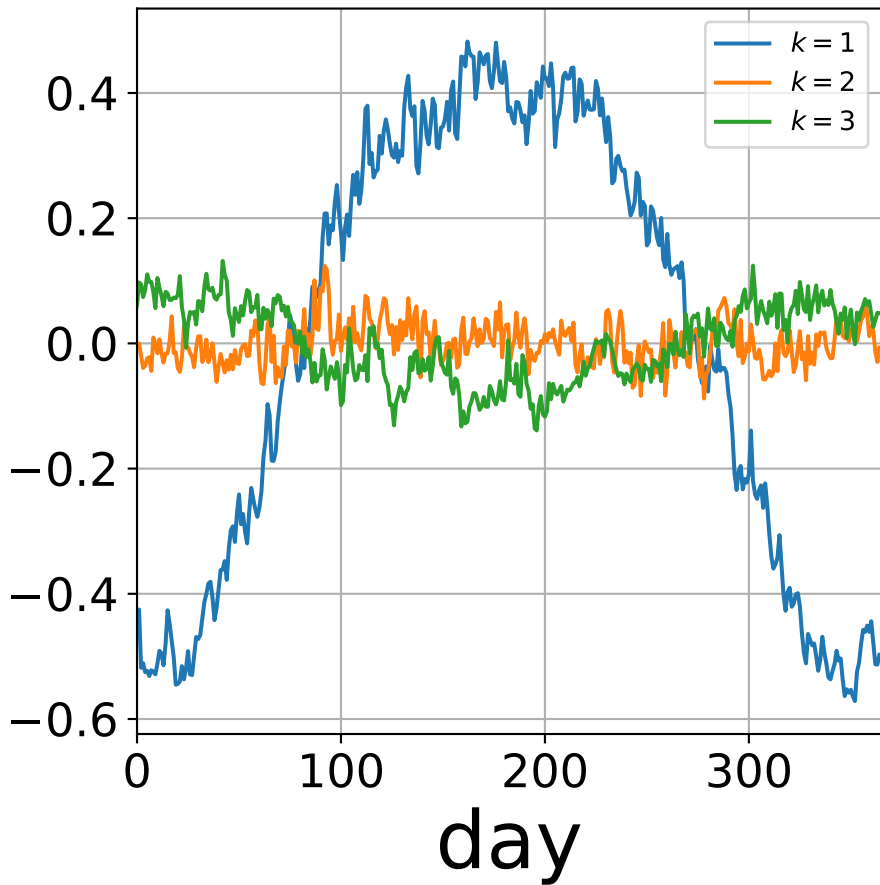

Supplement: s1 [file s1]

$a_k^{\text{intraday}}(t)$

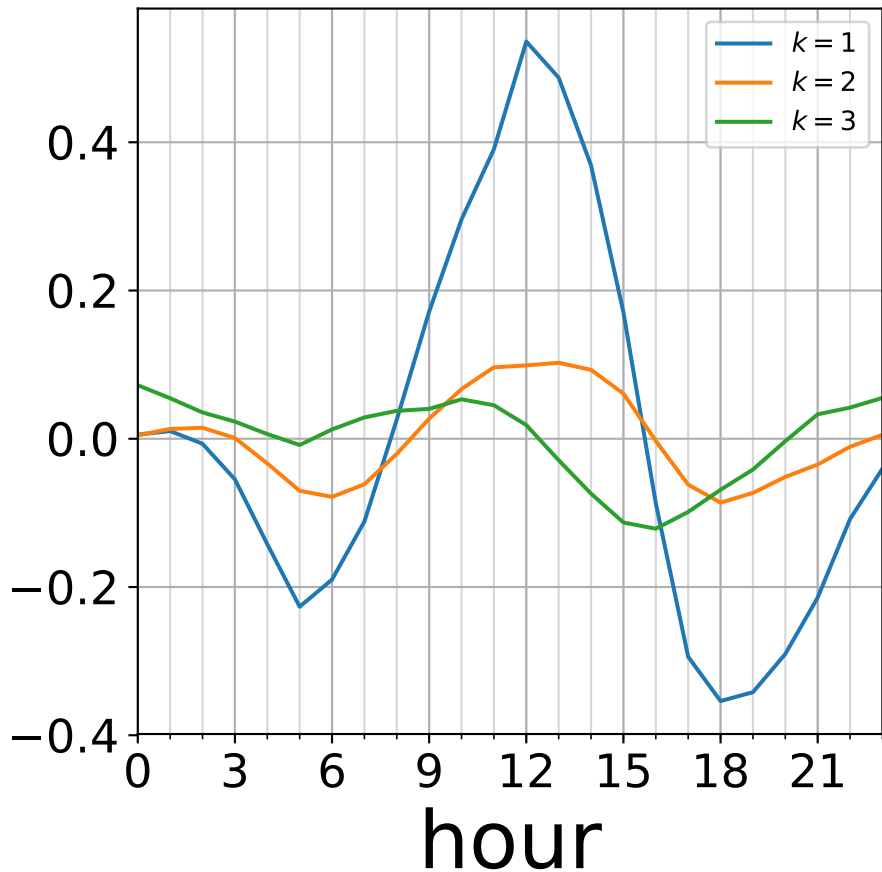

Supplement: s1 [file s1]

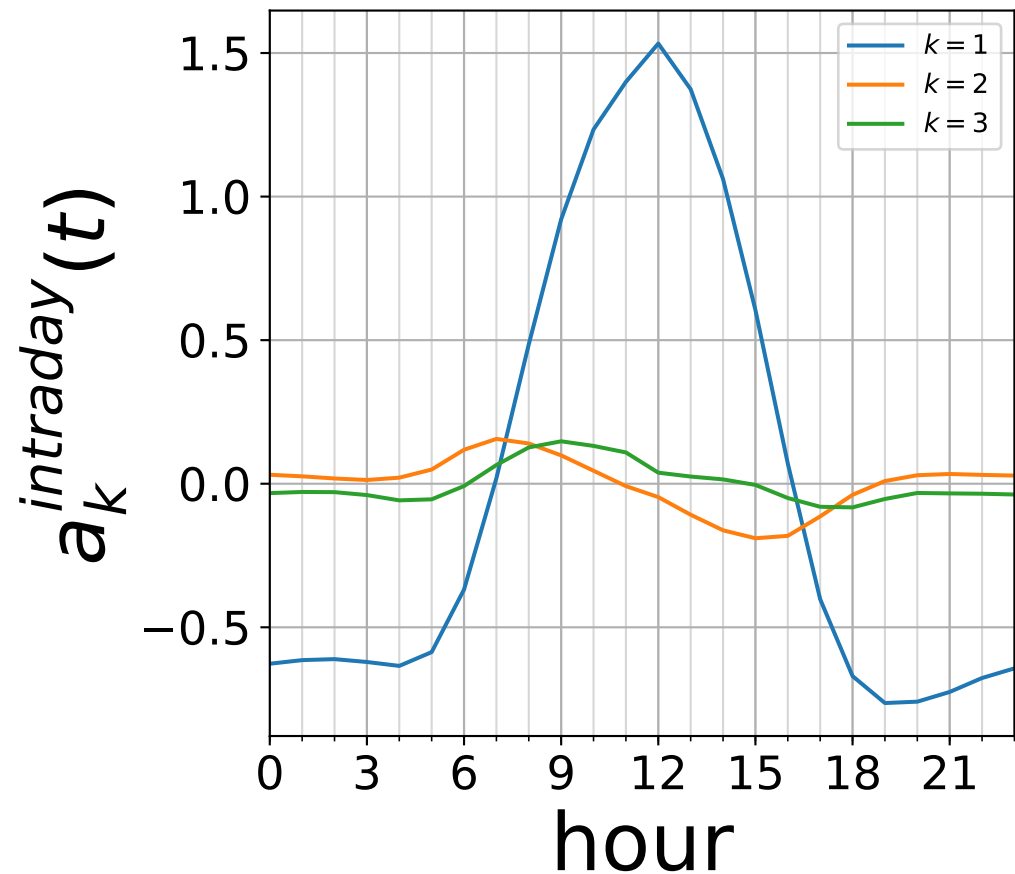

Supplement: s1 [file s1]

PC1  
 $\lambda_1=45.2\%$

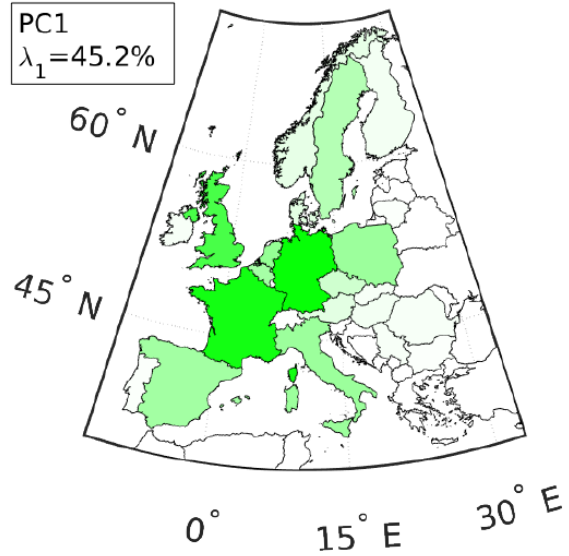

PC2  
 $\lambda_2=19.7\%$

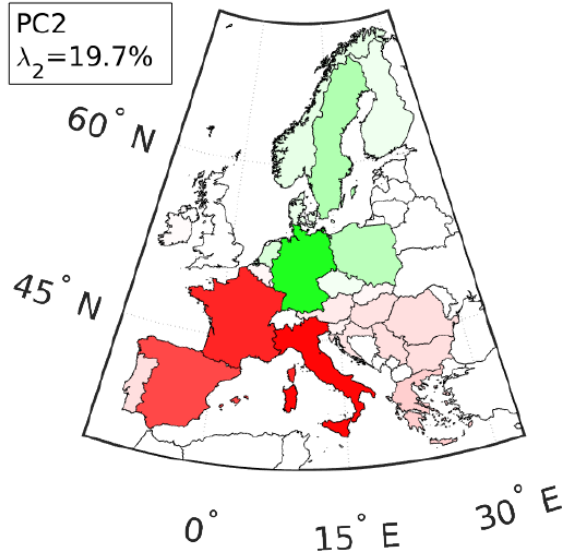

PC3  
 $\lambda_3=14.4\%$

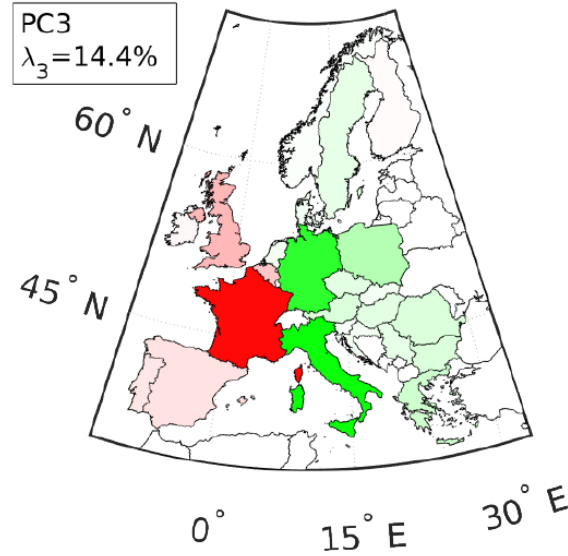

PC4  
 $\lambda_4=6.5\%$

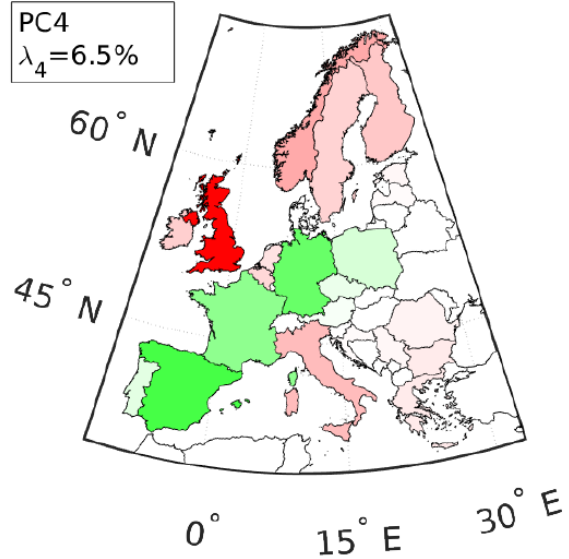

PC5  
 $\lambda_5=4.6\%$

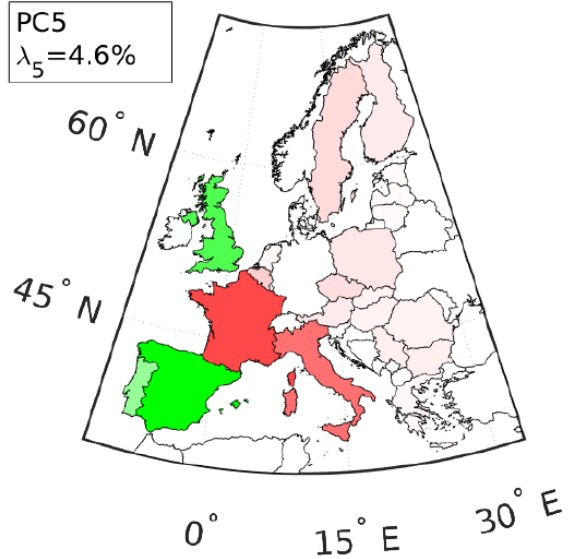

PC6  
 $\lambda_6=3.1\%$

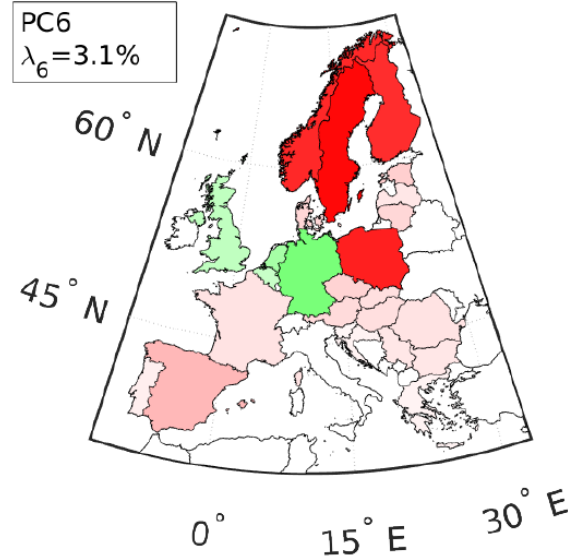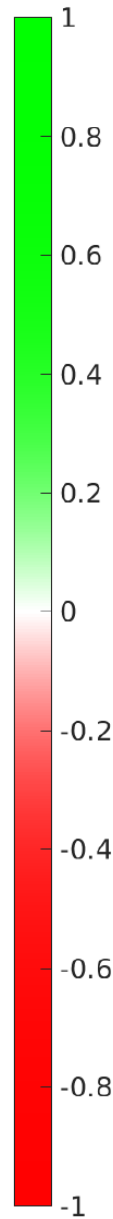

Supplement: s1 [file s1]

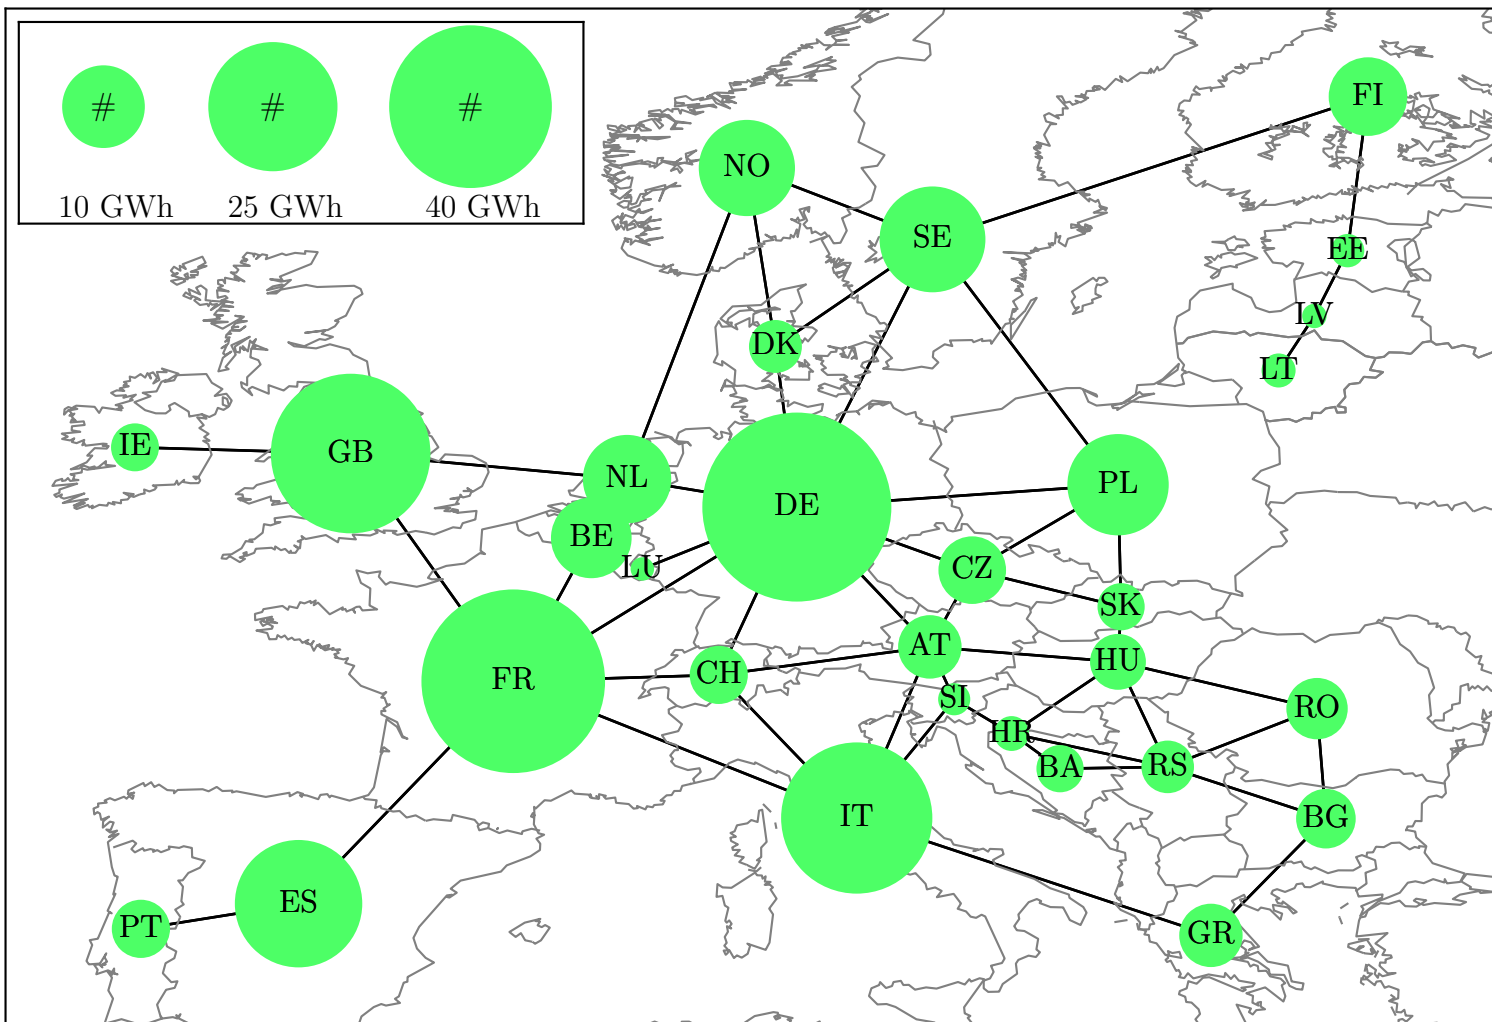

Supplement: s1 [file s1]

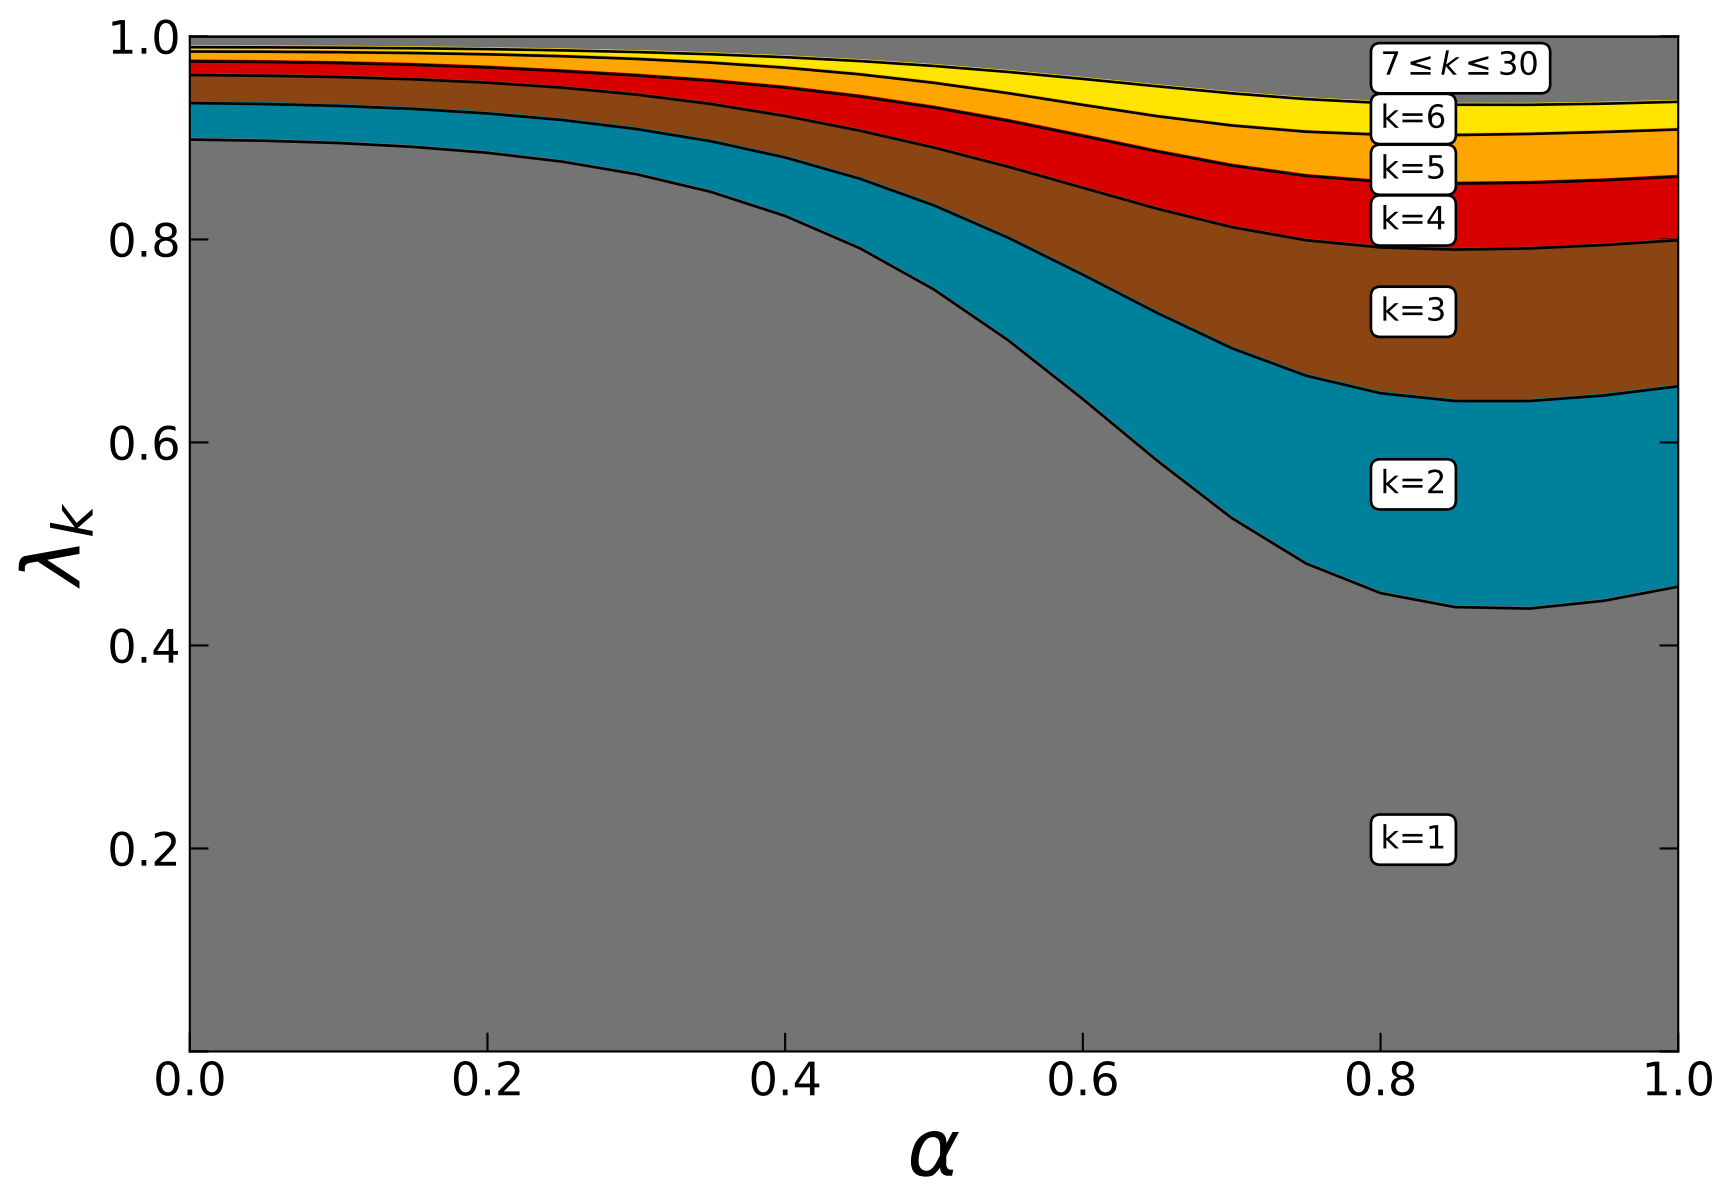

Supplement: s1 [file s1]

$a_k^{\text{seasonal}}(t)$

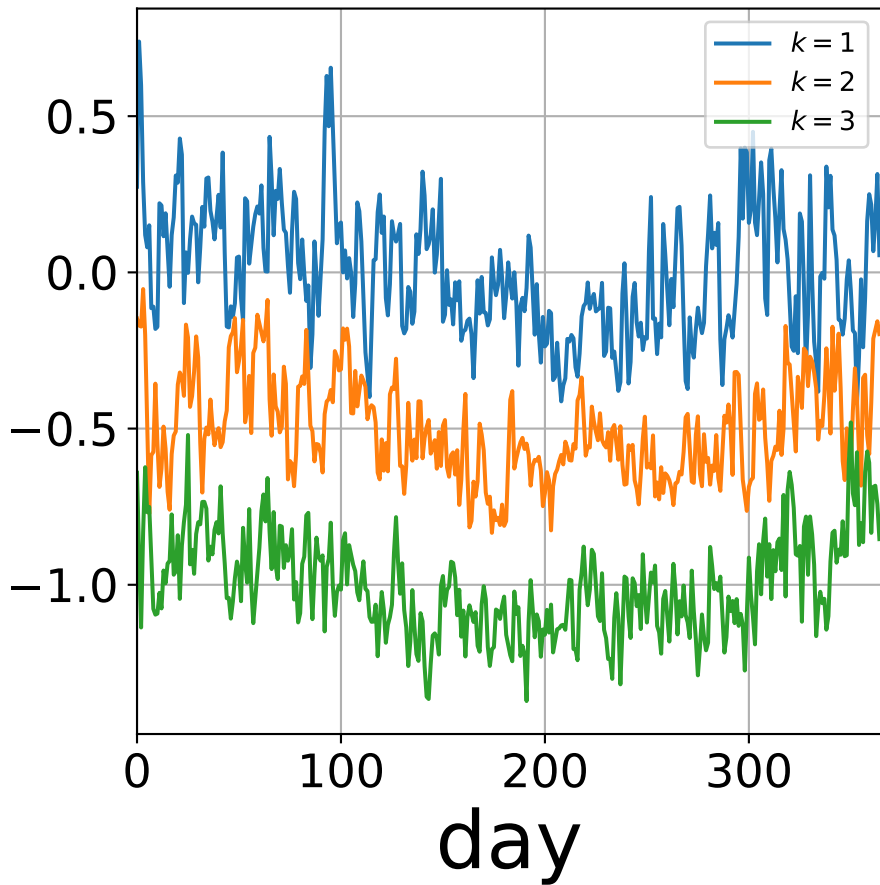

Supplement: s1 [file s1]

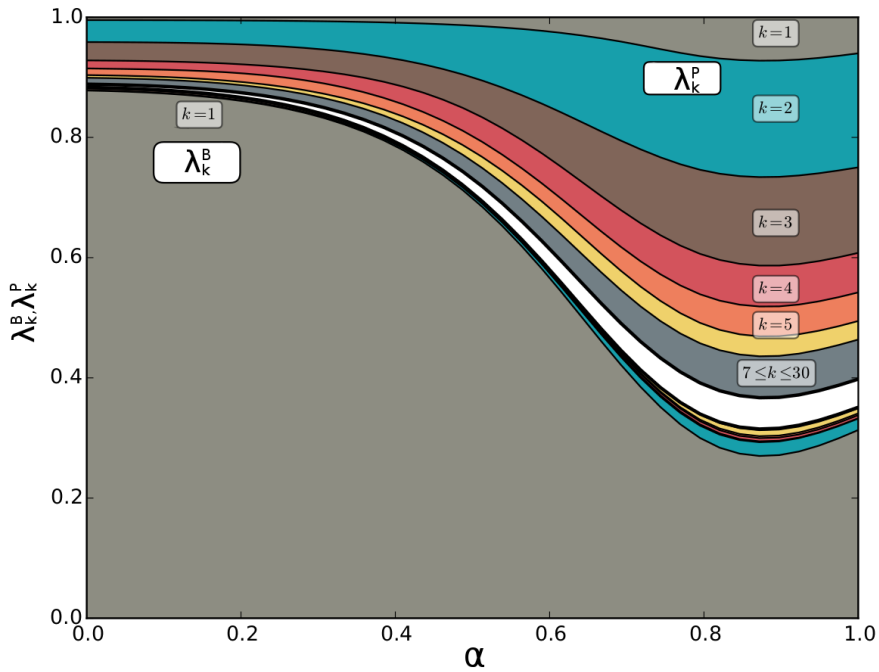

Supplement: s1 [file s1]
